# Supplementary material for: Machinability of a silicon carbide particle-reinforced metal matrix composite
Source: Royal Society of Chemistry journal article supplement (doi:10.1039/c6ra00340k), 2016-01-01
Supplement: c6ra00340k1.pdf [file c6ra00340k1.pdf]

## Supporting information

### Machinability of siliconcarbide particle-reinforced metal matrix composite

Qiong Wu<sup>a</sup>, Yu Si<sup>a</sup>, Guang-Sheng Wang<sup>a\*</sup> and Lei Wang<sup>b\*</sup>

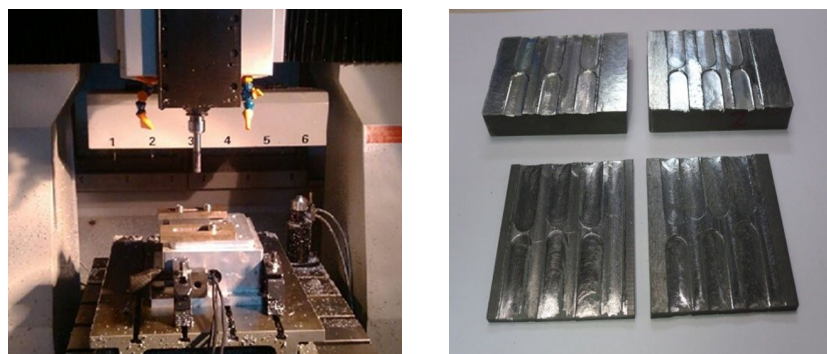

**Fig. S1** Set up used for milling and cutting force testing of the SiC particles workpiece

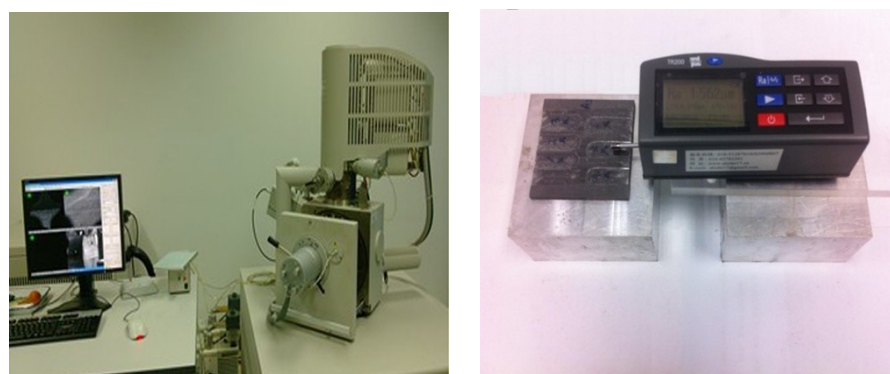

**Fig.S2** Experimental setup of surface morphology and surface roughness detector used for analyzing the SiCp/Al composite milled under different cutting parameters (Quanta250FEG type SEM)

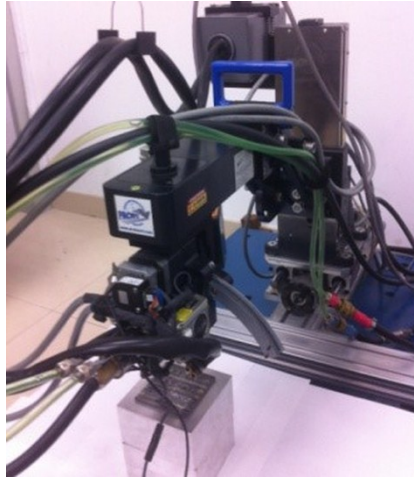

**Fig.S3** Experimental setup of the X-ray stress detector used for measuring the residual stress in SiCp/Al milled under different cutting parameters
